# Supplementary material for: A global assessment of academic promotion criteria: What really counts?
Source: Research Square preprint supplement (doi:10.21203/rs.3.rs-3011208/v1), 2023-06-09
Supplement: Supplementary file 1 [file 5bb81ec80b51e64f6f9e98f6.docx]

**EXTENDED DATA**


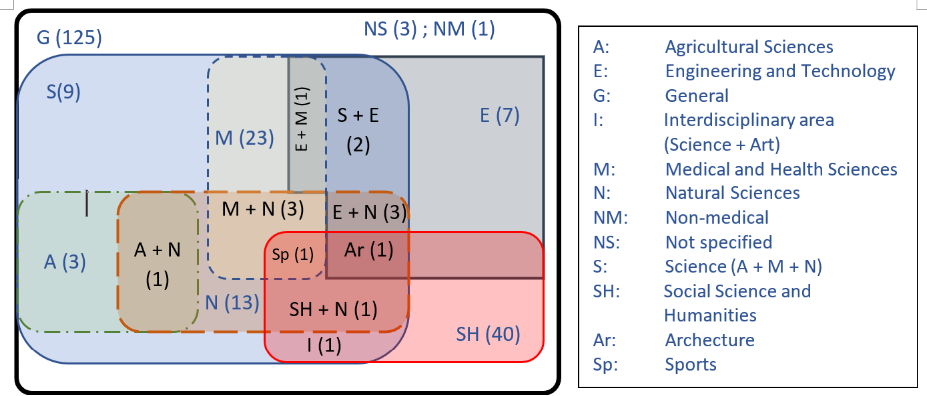


**Figure 1**.  **Classification of Disciplines**. The *number of policy documents listing criteria for the various disciplines encountered are shown in parenthesis next to the abbreviation of the discipline. Disciplines:* ***(A )*** *Agricultural sciences,* ***(E)*** *Engineering and technology,* ***(G)*** *General,* ***(I )****Interdisciplinary Science + Art,* ***(M)*** *Medical and health sciences,* ***(N)*** *Natural sciences,* ***(NM)*** *Non-medical sciences,* ***(NS)*** *Unspecified,* ***(S)*** *Science: Agricultural, Medical and Natural,* ***(SH)*** *Social sciences and humanities,* ***(Ar)*** *Architecture,* ***(Sp)*** *Sport.*


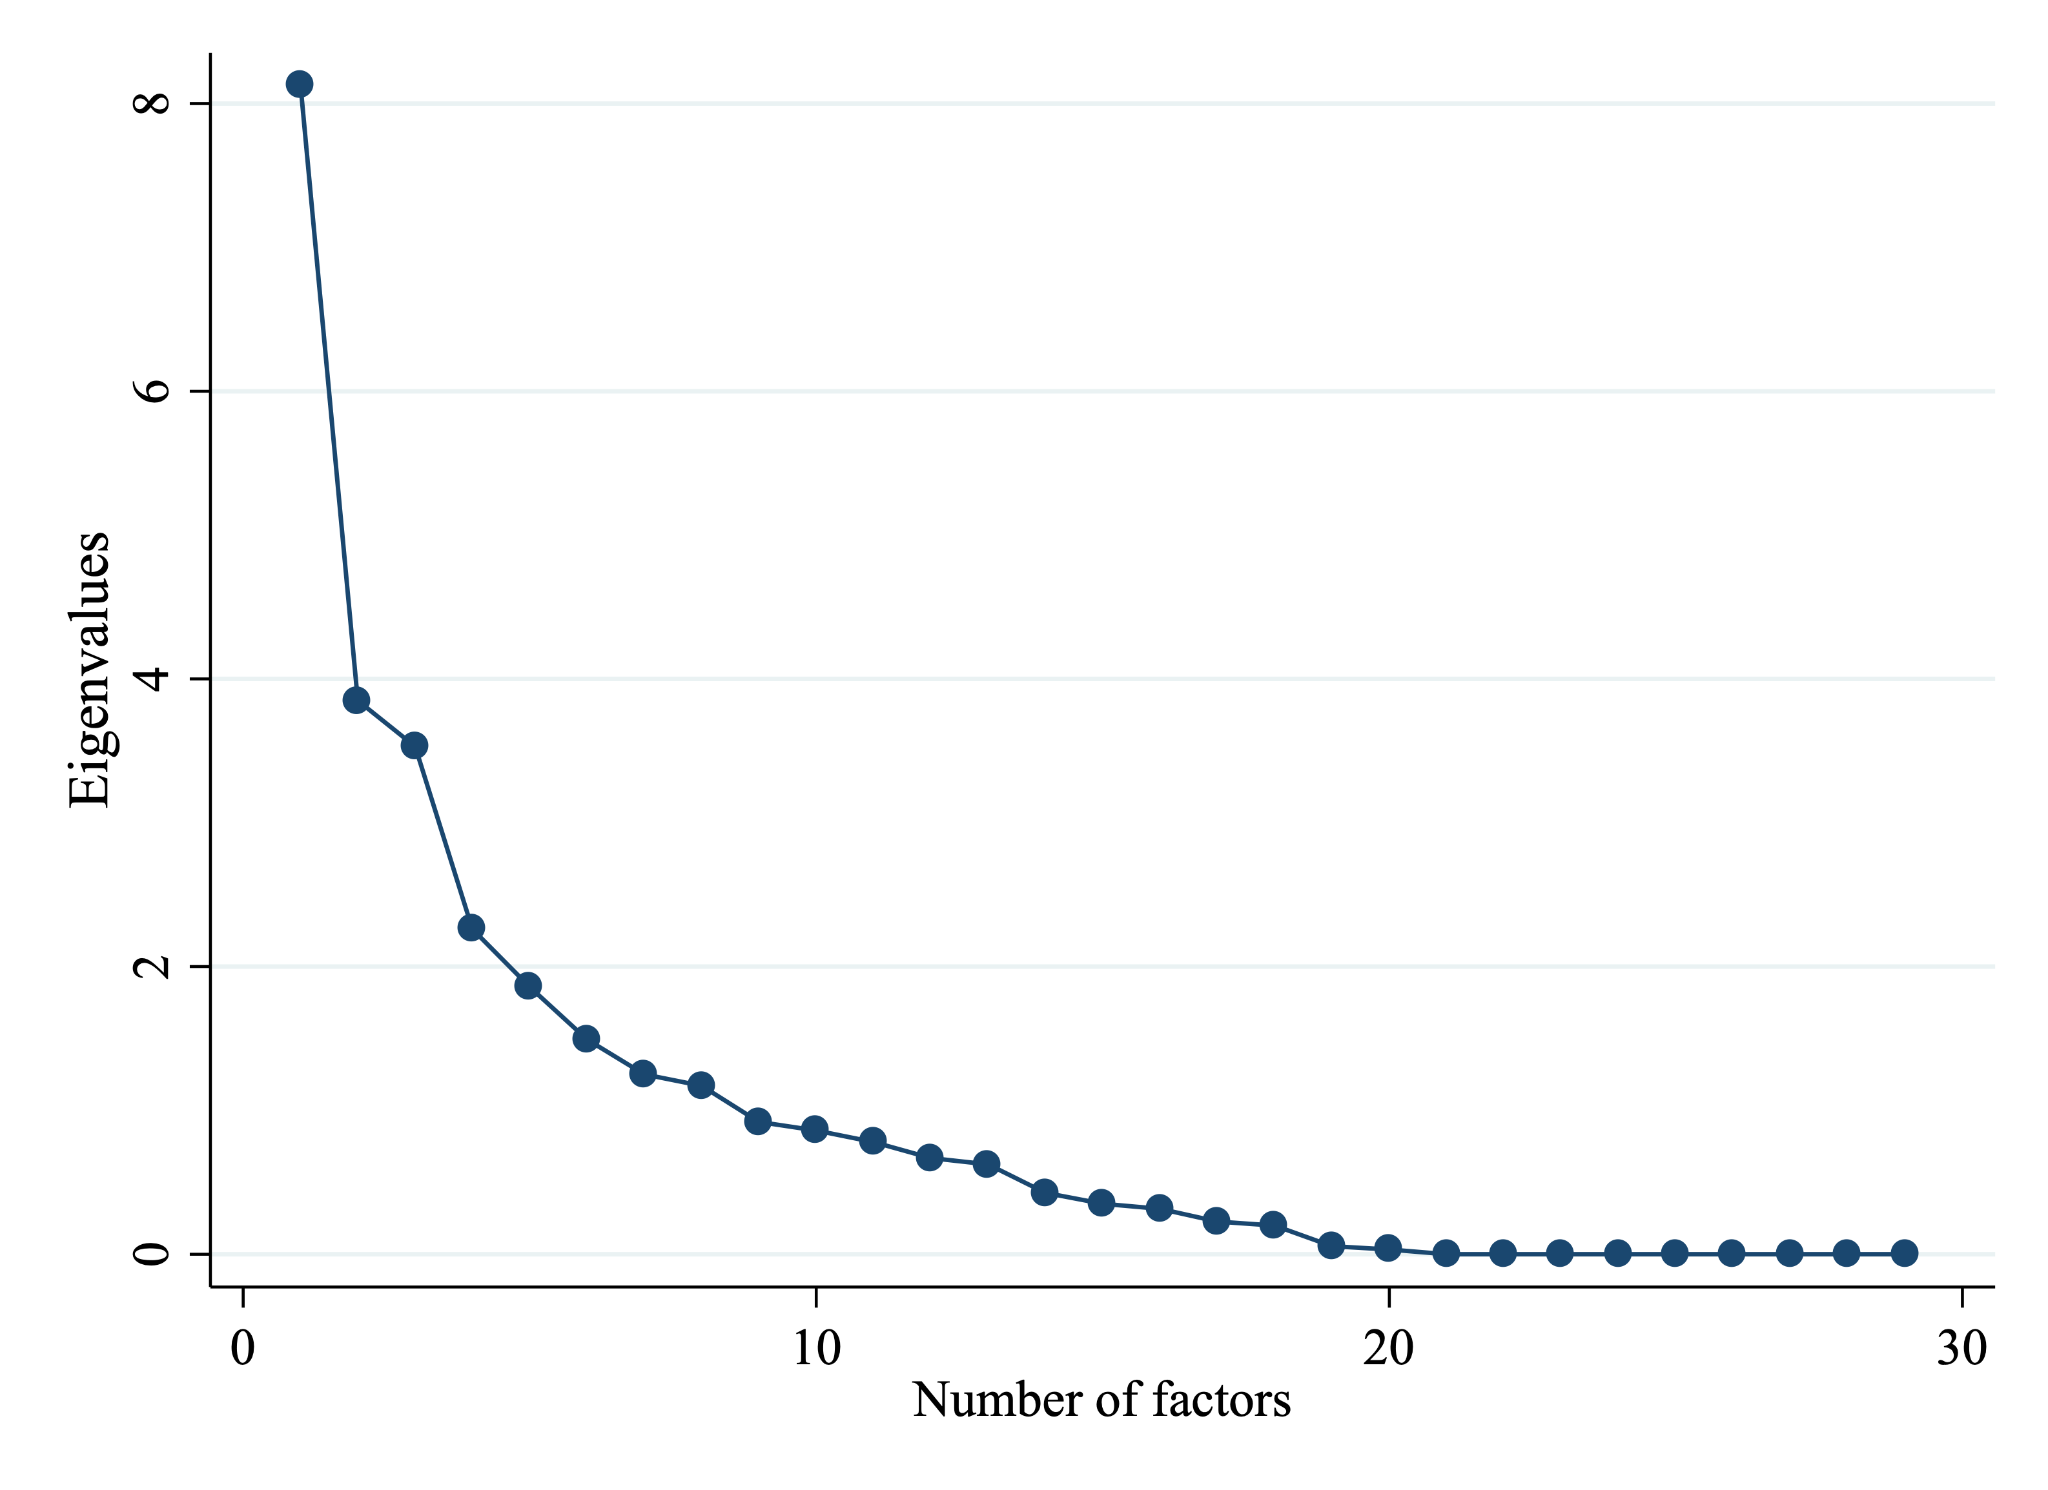


***Figure 2.* Screeplot for the factor analysis,**s*howing the factors obtained, ordered by eigenvalue.*
