# Supplementary material for: A global assessment of academic promotion criteria: What really counts?
Source: Research Square preprint supplement (doi:10.21203/rs.3.rs-3011208/v1), 2023-06-09
Supplement: Supplementary file 2 [file efa19c0bed9d2c60c13c9e64.docx]

**SUPPLEMENTARY INFORMATION**

**Table s1.**  **World regions included in the analysis.***Number of countries, institutions or agencies and policies surveyed per world region and number of policies per world region that were included in the study.*

| **Region** | **Countries** | **Institutions/ Agencies** | **Policies** |
| --- | --- | --- | --- |
| Africa | 11 | 16 | 51 |
| Asia | 18 | 46 | 70 |
| Australia | 1 | 3 | 4 |
| Europe | 16 | 34 | 47 |
| North America | 2 | 20 | 37 |
| Latin America & Caribbean | 7 | 8 | 12 |
| **Total** | **55** | **127** | **221** |

**Table s2. Evaluation categories for promotion to professorship.***List of the criteria extracted from the promotion policies, included in this study and their description or specific indications noted from the documents.*

| **Criteria** | **Description provided on surveyed policies** |
| --- | --- |
| **Research outputs** | This criterion refers to all forms of research outputs, including: *1)* publications: journal articles, conference papers, books, book chapters, monographs, policy briefs, magazine articles, etc; *2)* Intellectual property: copyright, patents, industrial design; and other. As we did not include arts disciplines in this study, we excluded mentioning of creative art works and exhibitions. |
| **Number of publications** | Quantity of outputs published by the candidate. These include: research articles, conference proceedings, technical books, book chapters, creative output, exhibitions etc. |
| **Recent publications** | Also found as: Publications in current position, number of publications after the last promotion, or number of publications in the last (x) years. Some policies specify the number of years to be considered. This may also refer to the number of publications authored while holding an associate professor position. |
| **Patents** | Refers to the number of patents generated by the candidate. Their impact on the evaluation differed between institutions, with some including them as a subcategory of number of publications; some not mentioning their impact in the evaluation and some awarding points (ranging from 0.5 - 3.0) as multiples of points awarded for research articles. |
| **Citations** | This criterion aims to assess the credibility of a candidates’ outputs via indexing systems and number of citations. The most frequently mentioned were: cumulative number of citations and h-index (from ResearcherID, Scopus, Google Scholar etc). |
| **Journal Impact Factor** | Evidence of publications in journals with a high quartile or impact index. This includes the number of publications in any types of indexed journals, sometimes also specifying a particular index ranking, such as Journal Impact Factor (JIF), or listed in the higher quartile (Q1 or Q2) of Journal Citation Reports (JCR), Science Citation Index, EI, Scopus, SJR, SciELO, among other. |
| **Number of contributing authors** | This criterion aimed at preventing unethical authorship practices, such as granting co-authorships to peers as a means of boosting the number of publications and citations. It penalised publications with larger numbers of contributing authors by using a credit system where the points granted per publication were related to the number of authors in the publication. |
| **Authorship order** | This criterion aims to assess authorship role on candidates’ published outputs by evaluating the authorship position on publications (e.g. first, second, corresponding, last author).Certain roles or author positions may reward higher points (e.g. first author or corresponding author). |
| **Non-metric journal quality** | Evidence of publications in recognised, peer-reviewed journals as perceived by the evaluator, and not reliant on metrics. For this criterion, some policies only mention that journals should be respected in the relevant discipline without requiring indexing information. This criterion provides the evaluator with the flexibility to assess whether a journal is respectable, based on their own experience, without requiring that it has a high impact or quartile index. |
| **Role of authors** | This criterion aims at the qualitative assessment of the roles of candidates on their authored work and verify that their contributions are significant. For this, evaluators are prompted to ask candidates about their contributions in a narratively manner or look at the contribution sections of publications. |
| **Non-metric quality of publications** | This criterion evaluates the quality of the publications withoutthe use of metrics or indexing systems (e.g. impact or quartile indexes). Instead, the evaluation of the quality of the publication is based on the judgement of the evaluator. Within the limited number of policies using this criterion; most just briefly mention the quality of the publication without providing any further details. For this criterion, we included policies that provided a description related to the quality of the publication without referring to indexing or metrics. |
| **Societal impact of outputs** | This criterion assesses the social impact of the work of a candidate. It prompts evaluators to look for tangible evidence of societal impact of outputs. Some policies specifically highlight that publications in high impact or quartile indexed journals do not necessarily correlate with societal impact. |
| **Funding** | This criterion looks for evidence of a candidate’s ability to acquire research funding (grants, fellowships and other), through which it intends to evaluate leadership and management skills in the candidate. |
| **Farsighted** | This criterion refers to policies that ask candidates to describe their plan for continuing to contribute to academia through research outputs, mentoring, teaching, service to the profession, etc. in a narrative format, which is then evaluated on demonstrated plans. |
| **Collaborations** | This criterion looks for evidence of collaborative work within academia and/or industry, and can be in the form of joint research projects, joint publications, joint supervision of postgraduate students, etc. |
| **Experience abroad** | This criterion evaluates international research experience through short-term fellowships, work experience through academic positions (e.g. postdoctoral, lectureship positions) and sabbatical leaves, among others. Short-term travel to participate in seminars, conferences and presentations do not apply. |
| **Presentations** | Here are evaluated all types of presentations proposed and delivered by the candidate in the form of technical presentations, science communication displays, exhibits and presentations in conferences, seminars, workshops, webinars, symposiums, etc. Note: keynote speaker roles are excluded here as this is included in the “*invited positions*” criterion. |
| **Professional development** | This criterion includes all types of activities falling under the umbrella of continuing professional development (CPD). These include: attending conferences, training courses, technical talks, seminars, webinars. Activities like delivering professional presentations or training workshops are excluded here, as they are evaluated elsewhere. |
| **Memberships** | Included in some policies, this criterion credits candidates for their involvement in various professional organisations enabling them to build their network or gain CPD points. This criterion is for membership without responsibilities, including paid memberships. Memberships to committees of professional organisations are not included here. |
| **Professional titles** | This criterion credits registered or licensed professional qualifications acquired through professional examinations awarding a title, such as professional engineer, chartered engineer, actualist, accountant, medical doctor, architect, etc. |
| **Invited positions** | This criterion credits the recognition or status of a candidate’s contributions in a research area. This may be in the form of invitations as keynote speaker, chairs of session in conferences, seminars or symposia. It also includes invitations to serve the field through other roles, such as editorial board member for respectable journals or awarded positions in professional bodies (elected). |
| **Awards** | This criterion credits for awards, honours and/or recognitions received at national or international level by the candidates and their research outputs. |
| **Commercialisation/consultancy** | This criterion credits translating research into societal solutions and generating economic values. It includes the commercialisation of research outputs, contracts, projects and consultancy services. |
| **Service to the profession** | This criterion credits the engagement in voluntary activities that require specialised skills and knowledge to advance the profession or field of knowledge. It emphasises on the services provided rather than the status of the position held. This includes, but is not limited to: peer-review of research outputs (e.g. publications) and research grants (applications and reviews), being a designated judge for a scientific event, being part of an organising committee for a field specific (e.g. conferences, symposia, workshops and seminars), serving in the committee for a professional organisation, clinical care activities, voluntary service to the industry etc. |
| **Mentoring** | This criterion merits mentorship roles, such as supervising postgraduate students at a Master’s and/or PhD degree (or equivalent). Some policies consider mentoring of early career researchers, young undergraduate scholars or junior academic staff. |
| **Teaching** | This includes all activities related to teaching, including lecturing, conducting tutorials, practical classes, developing teaching programmes and/or materials, etc. |
| **Admin. roles** | This criterion credits administrative roles held by the candidate in service to the institution. These roles were frequently evaluated together with institutional leadership, under the same criteria. Thus we evaluated both criteria combined. |
| **Community service** | This category merits the voluntary engagement of the candidate in serving the community or country (government) through its knowledge and experience. This includes: serving as scientific advisor for the government or engaging in science communication, community engagement activities and/or educational programmes aimed for the general public. |
| **Serving period** | This criterion looks into the length of time a candidate has served in academia or at the institution. Some policies require a minimum of years of service in academia before meriting promotion and some policies require a minimum period of service at a particular institution. |

**Table s3. Number of policies mentioning the three evaluation categories**: research (and research outputs), teaching and services. In parentheses is the number of policies mentioning the sub-category of research output.

| **Evaluation Category** | **National Policies** | **Institutional Policies** | **Total** |
| --- | --- | --- | --- |
| Research *(outputs)* | 37 *(37)* | 152 *(146)* | 189 *(183)* |
| Teaching | 23 | 147 | 170 |
| Service | 27 | 154 | 181 |

**Table s4. Heatmap of votes for the sub-categories.** *The blue colour heatmap denotes the number of votes, with darker blue implying more votes; the red boxes contain the five chosen sub-categories of high-voted promotion criteria that covered the most criteria with the minimum overlap.*

|  | **Sub-Categories** | | | | | | | | | | | | | |
| --- | --- | --- | --- | --- | --- | --- | --- | --- | --- | --- | --- | --- | --- | --- |
| Promotion Criteria | Productivity | Research outputs | Impact of work | Quality of Work | Contribution to the discipline | Innovation / Creativity | Continuous progress in research career | Professional Standing | Leadership | Research strategies for professional growth | Team work | Recognition | Teaching and academic contribution | Services |
| Number of publications | 20 | 19 | 9 | 7 | 15 | 8 | 10 | 11 | 8 | 9 | 9 | 11 | 4 | 1 |
| Recent publications | 20 | 20 | 8 | 8 | 14 | 9 | 20 | 12 | 9 | 14 | 8 | 11 | 5 | 2 |
| Patents | 18 | 19 | 17 | 12 | 14 | 21 | 14 | 11 | 8 | 11 | 3 | 11 | 1 | 1 |
| Citations | 16 | 18 | 19 | 16 | 16 | 7 | 10 | 13 | 8 | 9 | 4 | 12 | 0 | 1 |
| Journal impact factor | 13 | 18 | 16 | 12 | 17 | 10 | 12 | 15 | 10 | 10 | 5 | 15 | 2 | 0 |
| Number of contributing authors | 4 | 7 | 5 | 6 | 5 | 2 | 4 | 3 | 4 | 3 | 18 | 1 | 1 | 0 |
| Authorship order | 13 | 15 | 9 | 7 | 9 | 7 | 5 | 11 | 18 | 7 | 9 | 12 | 1 | 0 |
| Non-metric journal quality | 15 | 17 | 13 | 12 | 17 | 9 | 12 | 15 | 8 | 12 | 5 | 13 | 3 | 0 |
| Role of the authors | 12 | 12 | 9 | 12 | 13 | 11 | 9 | 9 | 11 | 9 | 15 | 11 | 3 | 1 |
| Non-metric quality of publications | 9 | 15 | 15 | 19 | 15 | 13 | 11 | 14 | 10 | 9 | 7 | 15 | 3 | 1 |
| Societal Impact of outputs | 10 | 14 | 18 | 17 | 16 | 11 | 11 | 15 | 9 | 10 | 7 | 15 | 3 | 1 |
| Funding | 18 | 15 | 12 | 12 | 10 | 13 | 15 | 15 | 18 | 20 | 14 | 14 | 4 | 6 |
| Farsighted | 7 | 6 | 7 | 7 | 9 | 17 | 14 | 8 | 15 | 17 | 7 | 7 | 5 | 6 |
| Collaborations | 13 | 12 | 9 | 8 | 8 | 7 | 8 | 8 | 11 | 17 | 21 | 9 | 3 | 4 |
| Experience abroad | 9 | 13 | 11 | 11 | 10 | 8 | 12 | 15 | 10 | 21 | 12 | 15 | 7 | 6 |
| Presentations | 16 | 12 | 7 | 6 | 9 | 3 | 11 | 8 | 2 | 14 | 4 | 7 | 7 | 1 |
| Professional development | 8 | 8 | 7 | 5 | 10 | 6 | 12 | 9 | 8 | 18 | 5 | 6 | 7 | 3 |
| Membership | 3 | 7 | 5 | 3 | 8 | 2 | 6 | 13 | 7 | 17 | 5 | 9 | 3 | 7 |
| Professional titles | 6 | 5 | 2 | 6 | 6 | 1 | 7 | 14 | 6 | 12 | 2 | 15 | 3 | 5 |
| Invited positions | 11 | 17 | 15 | 12 | 21 | 5 | 12 | 21 | 17 | 13 | 6 | 21 | 6 | 11 |
| Awards | 13 | 15 | 18 | 17 | 20 | 15 | 16 | 21 | 13 | 15 | 7 | 21 | 7 | 7 |
| Commercialisation | 10 | 10 | 16 | 8 | 10 | 14 | 10 | 11 | 8 | 9 | 2 | 11 | 2 | 13 |
| Service to profession | 10 | 6 | 5 | 4 | 13 | 3 | 9 | 12 | 10 | 11 | 9 | 13 | 7 | 18 |
| Mentoring | 11 | 6 | 8 | 7 | 12 | 3 | 8 | 10 | 15 | 10 | 11 | 9 | 15 | 13 |
| Teaching | 7 | 0 | 3 | 3 | 8 | 3 | 5 | 7 | 10 | 5 | 4 | 5 | 21 | 12 |
| Administrative roles | 7 | 0 | 2 | 2 | 1 | 2 | 3 | 11 | 13 | 6 | 7 | 12 | 7 | 19 |
| Community service | 7 | 0 | 10 | 5 | 5 | 4 | 2 | 12 | 13 | 8 | 8 | 14 | 5 | 19 |
| Serving period | 7 | 2 | 4 | 3 | 6 | 2 | 8 | 9 | 7 | 9 | 4 | 9 | 11 | 12 |

**Table s5.** **Evaluation criteria classified by the sub-categories defined by the authors.**

|  | **Sub-Categories** | **Criteria** |
| --- | --- | --- |
| **Research** | **Research outputs** | - Number of publications - Recent publications - Patents - Citations - Presentations - Journal impact factor - Non-metric journal quality - Number of contributing authors - Authorship order - Role of authors - Non-metric quality of publications - Societal impact of research outputs |
| **Career Development** | - Farsighted - Funding - Collaborations - Experience abroad - Presentations - Professional development - Memberships - Professional titles |
| **Research Recognition** | - Speaker/chair positions - Awards/fellowships |
| **Teaching** | | Contributions to teaching and education |
| **Service** | **Commercialisation / Consultancy** | Commercialisation of research, through patents and/or consultancies |
| **Service to the Profession** | - Member of a professional organisation committee - Members of an editorial board - Member of the organising committee (conferences, fora). - Reviewer of journals, grants, thesis |
| **Mentoring** | Mentoring of postgraduate students and early-career researchers |
| **Administrative roles** | Administrative roles or committee assignments in institution |
| **Community service** | Service activities to national agencies and communities |
| **Serving period** | Years of service in academic institutions |

**Table s6.** **Categorisation of criteria evaluating research outputs into quantitative and qualitative assessment**

|  | **Sub-criteria evaluating research output (publications)** |
| --- | --- |
| **Quantitative assessment** | - Number of publications - Recent publications - Patents - Number of citations - Journal impact factor - Authorship order - Number of authors |
| **Qualitative assessment** | - Non-metric journal quality - Role in publications - Non-metric quality of publications - Societal impact of research outputs |

**Table s7.** **Number of policies included in each category of analysis** *(Scope of policies, Global North-South divide, economic status of countries and disciplines. Research outputs are shown in parentheses within the research category.*

| **Category of Promotion criteria** | **Type of analysis** | | |
| --- | --- | --- | --- |
| **Institutional vs National** | **Global North-South & Economic status** | **Discipline** |
| **Research (outputs)** | 189 *(183)* | 189 *(183)* | 170 *(164)* |
| **Teaching** | 170 | 170 | 155 |
| **Services** | 181 | 181 | 159 |

***Table s8. Heatmap of* correlation among the criteria in each document.***matrix of tetrachoric correlations among all the criteria used in the analysis, in terms of presence/absence in the same policies. The original matrix with tetrachoric correlations (corr.) is not positive semidefinite (it has 9 negative eigenvalues); for the purposes of the subsequent factor analysis it has been adjusted to be positive semidefinite (adjusted-corr., shown in the table below). The correlation between the matrices of corr. and adjusted corr. is 0.45. N= 151*

***
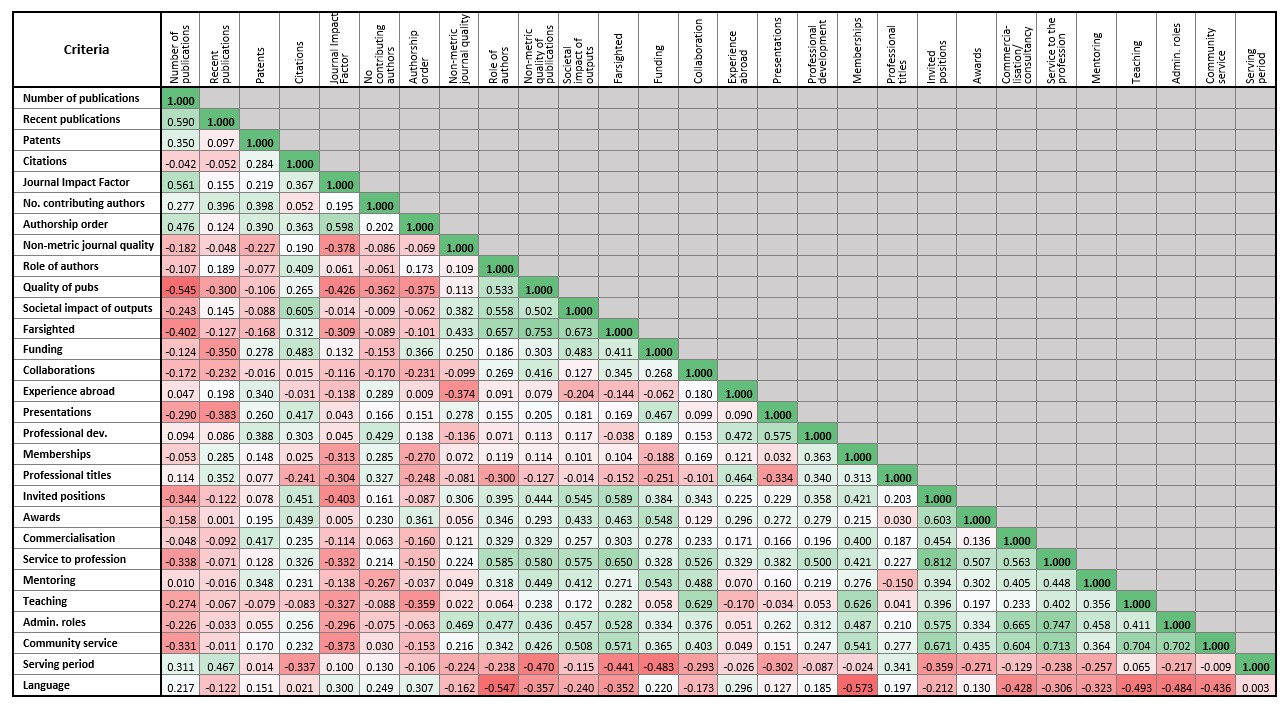
***

**Table S9. Differences in the distribution of each factor, between national policies vs institutional policies, and policies implemented in the global North vs in the global South.** *This table provides a summary of the results of Kolmogorov-Smirnov (K-S) tests (to compare two groups with non-normal distributions) on the differences in the observed distributions of each factor. Here: The null hypothesis (H0) is of no difference (diff = 0) in the distribution between the compared categories. The test value (D) is the maximum absolute difference between the cumulative distribution functions of the compared groups. p-value = confidence level of the test value. Highlighted in blue and in bold are the cases where p < 0.05. Legend: the alternative hypothesis is that one category (reported) is less than (<); greater than (>); or different from (≠) the other. N=151*

| **Categories** | **Factor** | **Tested alternative** | ***D*** | ***p*-value** |
| --- | --- | --- | --- | --- |
| National (N) vs Institutional (I) policies | Quality of the candidate | **N < I** | **0.467** | **0.000** |
| N > I | - 0.046 | 0.926 |
| **N ≠ I** | **0.467** | **0.000** |
| Career development | N < I | 0.045 | 0.930 |
| **N > I** | **- 0.308** | **0.032** |
| N ≠ I | 0.308 | 0.050 |
| Impact metrics | **N < I** | **0.397** | **0.003** |
| N > I | - 0.048 | 0.921 |
| **N ≠ I** | **0.397** | **0.004** |
| Cumulative output | **N < I** | **0.376** | **0.006** |
| N > I | - 0.015 | 0.991 |
| **N ≠ I** | **0.376** | **0.008** |
| Global North (N) vs South (S) | Quality of the candidate | N < S | 0.055 | 0.798 |
| **N > S** | **- 0.294** | **0.002** |
| **N ≠ S** | **0.294** | **0.002** |
| Career development | **N < S** | **0.476** | **0.000** |
| N > S | 0.000 | 1.000 |
| **N ≠ S** | **0.476** | **0.000** |
| Impact metrics | N < S | 0.192 | 0.064 |
| N > S | - 0.094 | 0.517 |
| N ≠ S | 0.192 | 0.109 |
| Cumulative output | N < S | 0.141 | 0.228 |
| N > S | - 0.158 | 0.153 |
| N ≠ S | - 0.158 | 0.268 |

**Table S10. Differences between policies by economic status of the country and disciplines.** *This table presents the results of the Kruskal-Wallis rank tests (to compare multiple groups with non-normal distributions), looking for systematic differences in each of the factors across different policy categories. Here: the null hypothesis (H0) is of no difference (diff = 0) between the categories. N. categories = the number of categories included the analysis and the degrees of freedom (df) of the test; χ2 = value of the test statistics; p-value = confidence level of the test statistic. Highlighted in blue and in bold are the cases where p < 0.05. N is shown in parenthesis next to the factor N=151*

| **Policy Category** | **N. categories (df)** | **Factor** | **χ2** | ***p*-value** |
| --- | --- | --- | --- | --- |
| Economic status of the country | 4(3) | **Candidate quality** | **15.762** | **0.0013** |
| **Career development** | **44.233** | **0.0001** |
| **Impact metrics** | **25.438** | **0.0001** |
| Cumulative outputs | 3.083 | 0.3790 |
| Disciplines | 5(4) | Candidate quality | 4.626 | 0.3279 |
| Career development | 3.270 | 0.5137 |
| Impact metrics | 5.156 | 0.2717 |
| Cumulative outputs | 7.519 | 0.1109 |

**Table S11. Systematic differences in individual assessment criteria across the comparative analysis.** *Pearson χ2 tests were performed to assess differences in the distributions of criteria within the different comparative analyses performed in this study: scope of policies (national vs institutional), regional (Global North vs South), country income group (high, upper-middle, lower-middle, and low income countries), and analysis by discipline. The null hypothesis (H0) assumes no differences (diff = 0) in the distributions of the criteria;* ***χ2 =*** *Pearson chi-squared statistics with the degrees of freedom shown in parenthesis. χ2 values highlighted in yellow are above the critical value at a 0.01% significance level. Values in bold are at least 5 times higher than the critical value, while values lower than the critical value have grey font.* ***P =*** *confidence level in terms of p-value. p-values < 0.01 are highlighted in dark green and in bold, p-values between 0.01- 0.05 are highlighted in light green and with green font, and p-values <0.5 have grey font.*

| **Criteria** | **Scope of policies** | | **Regional distribution** | | **Income classes** | | **Disciplines** | |
| --- | --- | --- | --- | --- | --- | --- | --- | --- |
| **χ2 (1)** | ***P*** | **χ2 (1)** | ***P*** | **χ2 (3)** | ***P*** | **χ2 (4)** | ***P*** |
| Number of publications | 0.442 | 0.506 | **205.628** | **0.000** | **300.035** | **0.000** | 36.078 | 0.462 |
| Recent publications | 0.055 | 0.815 | 15.950 | 0.207 | **114.061** | **0.010** | 18.533 | 0.763 |
| Patents | 0.324 | 0.569 | 52.239 | **0.022** | 55.303 | 0.137 | **177.777** | **0.001** |
| Citations | 21.825 | 0.140 | 0.208 | 0.648 | **191.732** | **0.000** | 20.866 | 0.720 |
| Journal Impact Factor | 13.968 | 0.237 | **229.565** | **0.000** | **451.030** | **0.000** | **125.571** | **0.014** |
| Number of contributing authors | 0.684 | 0.408 | 52.482 | **0.022** | 53.798 | 0.146 | **122.563** | **0.016** |
| Authorship order | **127.511** | **0.000** | 35.467 | 0.060 | **132.016** | **0.004** | 48.141 | 0.307 |
| Non-metric journal quality | 34.476 | 0.063 | 31.822 | 0.074 | 38.807 | 0.275 | 29.392 | 0.568 |
| Role of authors | 16.430 | 0.200 | 14.915 | 0.222 | **137.470** | **0.003** | 25.515 | 0.635 |
| Non-metric quality of pubs | 40.317 | **0.045** | **129.952** | **0.000** | **203.055** | **0.000** | 10.720 | 0.899 |
| Societal impact of outputs | 18.049 | 0.179 | 0.118 | 0.732 | **118.123** | **0.008** | 24.150 | 0.660 |
| Funding | 56.917 | **0.017** | **96.523** | **0.002** | **222.658** | **0.000** | 81.338 | 0.087 |
| Farsighted | **151.296** | **0.000** | 13.246 | 0.250 | **273.592** | **0.000** | 19.312 | 0.748 |
| Collaborations | 0.316 | 0.574 | 38.597 | **0.049** | 79.263 | **0.048** | 16.825 | 0.794 |
| Experience abroad | 0.057 | 0.811 | 27.764 | 0.096 | 64.560 | 0.091 | 63.866 | 0.172 |
| Presentations | 22.369 | 0.135 | 16.611 | 0.197 | 88.790 | **0.031** | 56.560 | 0.226 |
| Professional development | 0.974 | 0.324 | 0.707 | 0.400 | 34.840 | 0.323 | 26.684 | 0.615 |
| Memberships | 56.003 | **0.018** | **77.138** | **0.005** | 89.198 | **0.030** | 20.303 | 0.730 |
| Professional titles | 12.470 | 0.264 | 0.081 | 0.775 | **125.937** | **0.006** | 33.201 | 0.506 |
| Invited positions | **88.764** | **0.003** | **87.254** | **0.003** | **158.368** | **0.001** | 49.798 | 0.289 |
| Awards | **163.444** | **0.000** | 0.071 | 0.790 | 71.563 | 0.067 | 20.409 | 0.728 |
| Commercialisation/consultancy | **91.135** | **0.003** | 0.008 | 0.929 | 44.523 | 0.217 | 17.503 | 0.782 |
| Service to the profession | **170.249** | **0.000** | **107.679** | **0.001** | **227.041** | **0.000** | 56.231 | 0.229 |
| Mentoring | 10.959 | 0.295 | 19.333 | 0.164 | 31.186 | 0.374 | **140.813** | **0.007** |
| Teaching | 0.020 | 0.886 | 0.014 | 0.904 | 26.830 | 0.443 | **137.047** | **0.008** |
| Admin. roles | **200.991** | **0.000** | 57.102 | **0.017** | **129.138** | **0.005** | 29.423 | 0.568 |
| Community service | **138.769** | **0.000** | 36.020 | 0.058 | **116.697** | **0.009** | **98.673** | **0.043** |
| Serving period | **155.900** | **0.000** | **99.508** | **0.002** | **224.325** | **0.000** | 81.769 | 0.085 |
| Language | 0.945 | 0.331 | 0.434 | 0.510 | 66.980 | 0.082 | 94.113 | 0.052 |
| **Quantitative criteria** | *0.840* | *0.359* | *49.741* | ***0.026*** | *72.027* | *0.066* | *19.951* | *0.737* |
| **Qualitative criteria** | ***71.972*** | ***0.007*** | ***124.719*** | ***0.000*** | ***365.809*** | ***0.000*** | *81.559* | *0.086* |
